# Supplementary material
Source: Springer Nature journal article supplement (https://www.springermedizin.de/resource/supplementary/12936_2011_2030_MOESM3_ESM.pdf/9543008)

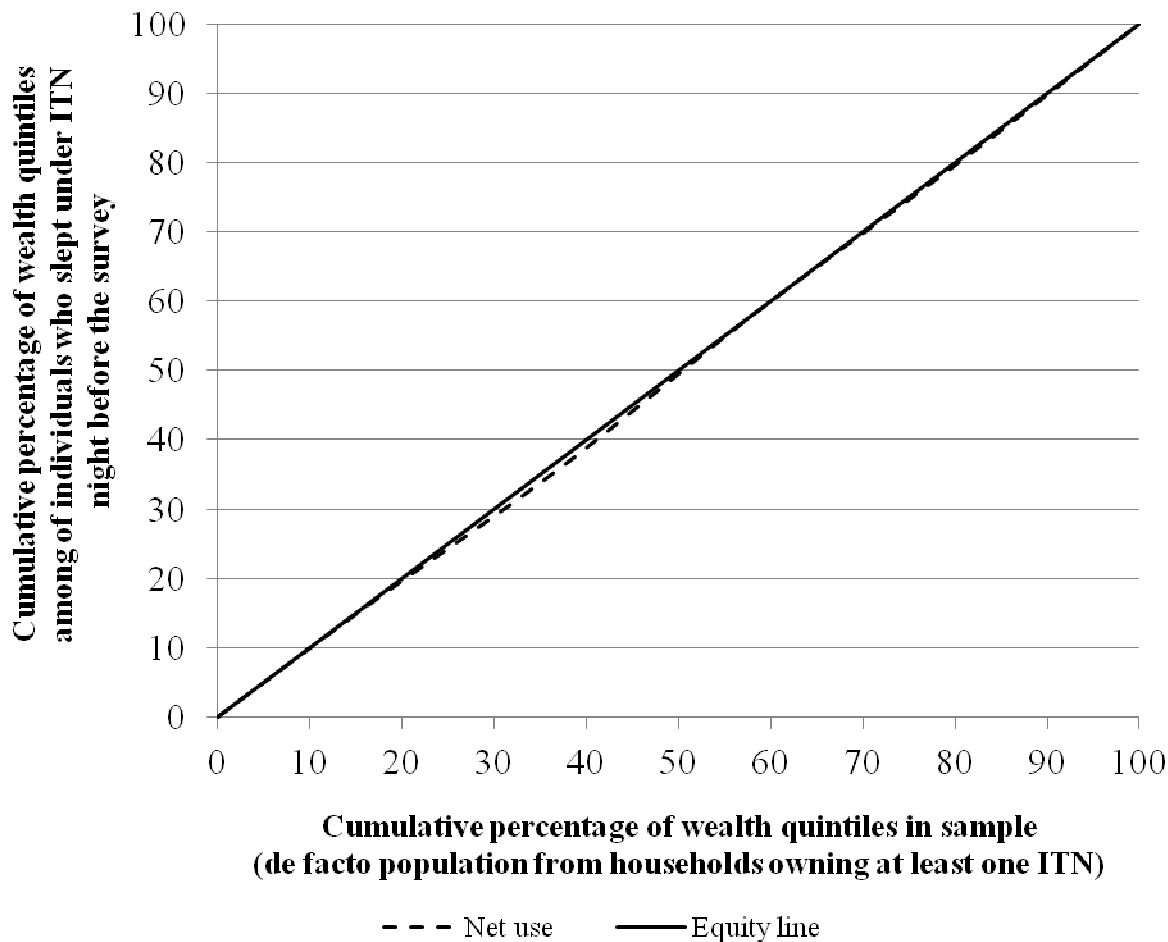

**Concentration index (95% CI): 0.01 (0.00 ; 0.02)**

Supplement: MOESM3 [file 9543008]
